# Supplementary material
Source: PubMed Central journal article supplement (PMC4310626)
Supplement: bi501403t_si_001.pdf [file bi501403t_si_001.pdf]

## **Supporting Information**

### **Conserved amino acid residues of the NuoD segment important for structure and function of *Escherichia coli* NDH-1 (complex I)**

Prem Kumar Sinha, Norma Castro-Guerrero, Gaurav Patki, Motoaki Sato, Jesus Torres-Bacete, Subhash Sinha, Hideto Miyoshi, Akemi Matsuno-Yagi, and Takao Yagi

|                       |         |
|-----------------------|---------|
| Supplemental Figure 1 | p.2 - 5 |
| Supplemental Figure 2 | p.6     |
| Supplemental Figure 3 | p.7     |

## Supplemental Figure 1

*NuoCDEco* 1 MTDLTAQEPAWQTRDHLDDPVI GELRNRF GPD AFTVQATR TGVPV VVWIKREQLLEVGDFL  
*NuoCDRsp* 1 -----MSLDQAIPEALQALRTRFGAAVRAEQATGEAF PVLWLDASVWEAAHRFL  
*NuoDRca* 1 -----  
*Nqo4Pde* 1 -----  
*Nqo4Tth* 1 -----  
*NuoDMtu* 1 -----  
*49kYli* 1 -----  
*49KNcr* 1 -----  
*49KXla* 1 -----  
*49KBta* 1 -----  
*49KHsa* 1 -----  
*HyfGEco* 1 -----MNVNSSNRGEAILAALKTQFPGAVLDEERQTPEQVTITVKINLLPDVVQYL  
*HycEEco* 1 -----MSEKLGQHLYLAALNEAFPGVVLDAHAWQTKDQLT VTKVNYLPEVVEFL  
*FpoDMma* 1 -----

*NuoCDEco* 61 -KKLPKPYVMLFDLHGMDERLRTHREGLPAADF SVFYHLISIDRNRD MLKVALAENDLH  
*NuoCDRsp* 50 REEIAAPFPLLADLWAIDESLRQHRTGQPASRITLCSHLVSLVRNAD RLKLATDG---R  
*NuoDRca* 1 -----  
*Nqo4Pde* 1 -----  
*Nqo4Tth* 1 -----  
*NuoDMtu* 1 -----  
*49kYli* 1 -----MLRSAAARA VRAVRPR-----  
*49KNcr* 1 -----MATTLFRLAGRNAKRHC MRQSTTIAH  
*49KXla* 1 -----MAALRAI GRLR-----  
*49KBta* 1 -----MAALRAI CRLRGA-----  
*49KHsa* 1 -----MAALRAI CGFRGV-----  
*HyfGEco* 53 YYQHDGWL PVLFG-----NDER TLNGHYAVYYALSMEGA EKCVVVKALVDADSRE  
*HycEEco* 50 YYKQGGWLSVLFG-----NDER KLNGHYAVYYVLSMEKGT KCWTVRVEVDANKPE  
*FpoDMma* 1 -----

*NuoCDEco* 120 VPTFTKLF PNANWYERETWDLFGITFDGHPNLRRI MPQTWKGHPLRKDYPARATEFSPF  
*NuoCDRsp* 107 APSIAGVYANADWYEREAHDMFGLDFG--RETRRI MPPTWEGHPLLKTHYARATEKPPF  
*NuoDRca* 1 -----  
*Nqo4Pde* 1 -----  
*Nqo4Tth* 1 -----  
*NuoDMtu* 1 -----MTAIAD  
*49kYli* 17 --LSARYMA-----TTAIPQDP IP SGALGQKVP HVDESHQDL  
*49KNcr* 27 NLNSTRAFS-----ASAIRRYAEPS-YEQGTRLVPTGDDFA  
*49KXla* 12 --APSGLLS-----GRWIKLP-QSVRGK-QWQPDVEWTEQYA  
*49KBta* 14 --AAQVLRP-----GAGVRLPIQPSRGARQWQPDVEWAEQYG  
*49KHsa* 14 --AAQVLRP-----GAGVRLPIQPSRGVRQWQPDVEWAQQFG  
*HyfGEco* 104 FPSVTPRVPAAVWGEREIR-----DMYGLIPVGLPDQRRLLVLPDDWPEDMHP  
*HycEEco* 101 YPSVTPRVPAAVWGEREVR-----DMYGLIPVGLPDERRLLVLPDDWPDELYP  
*FpoDMma* 1 -----

NuoCDEco 180 ELTKAKQDLEMEALTFKPEEWGMKRGTENEDEFMFLNGLGNHPSAHGAFRLVVLQLDGEEIV  
 NuoCDRsp 165 VLTDRLFEEAERATITDPELLGLPTLRDGEELMVLNFGPHHPSTHGVRILLGLDGEFVV  
 NuoDRca 1 -----MDGDIRHNSYDDGSEDVLTGEQSI RNFNINFGPQHPAAHGVLRLMVLLELDGEIVE  
 Nqo4Pde 1 -----MDGDIRKNSYDDGSM DALTGEQSI RNFNINFGPQHPAAHGVLRLMVLLELDGEIVE  
 Nqo4Tth 1 ----MREEFLEEIPLDAPP--EEAKELRT-EVMTLNVGPQHPSTHGVLRLMVLLELDGEIVL  
 NuoDMtu 7 SAGGAGETVLVAGGQDWQVDAARSADPGERIVVMNGPQHPSTHGVLRLMVLLELDGEIVV  
 49kYli 52 LFR TSHMVEDLETYDED-SPINTSDANTRIRAFTINFGPQHPAAHGVLRLMVLLELDGEEII  
 49KNcr 63 PNNDLYGLEALKADGAPRVPPQDHILARKVRHYTVNFGPQHPAAHGVLRLMVLLELDGEEIV  
 49KXla 45 G-AVMYPSTITEKWWPAPWNDKDPPIQKAVSNLTINFGPQHPAAHGVLRLMVLLELDGEEIV  
 49KBta 49 G-AVMYPKETAHWKPPPWNVDVDPKDTLVSNLTINFGPQHPAAHGVLRLMVLLELDGEEIV  
 49KHsa 49 G-AVMYPKETAHWKPPPWNVDVDPKDTIVKNLTINFGPQHPAAHGVLRLMVLLELDGEEIV  
 HyfGEco 151 LRKDAMDYRLRPEPTT DSETYPFINE-GNSDARVLPVGPDIHTSDEPGHFRLFVDGEQIV  
 HycEEco 148 LRKDSMDYRQRPAPT TDAET YEFINELGDKKNVVP IGPDIHVT SDEPGHFRLFVDGENII  
 FpoDMma 1 -----MEEMLESNEMIVHIGPQHPMQPGPFRLMLKIKGETIM

NuoCDEco 240 DCVPDITGYHHRGAEKMG ERQS-WHSYIPYTDRL EYLGGCVNEMPYVLA VEKLAG----IT  
 NuoCDRsp 225 WAWPDI GYHHRGAEKMAERQIT-WHGFIPYCDRLDY LGGVISEL PYLLAVERLCG----IA  
 NuoDRca 55 RADPHIGLLHRGTEKLMESRT-YLQNTPYFDRLDYVAPMNOEHAWCLAIEKLTG----TA  
 Nqo4Pde 55 RADPHIGLLHRGTEKLMESRT-YLQNLPLYDRLDYVAPMNOEHAWCLAIERLTG----TV  
 Nqo4Tth 54 EVVPHIGY LHTGFEKTM EHRT-YLQNLTYTPRMDYLHSFAHDLAYALAVEKLLG----AV  
 NuoDMtu 67 EARCIGY LHTGIEKNLE YRY-WIQGVTFVTRMDYLS PFFNETAYCLGVEKLLGI--TDE  
 49kYli 111 RSDPHVGLLHRGTEKLE YKT-YMQALPYFDRLDYVSM MTNEQVFS LAVEKLLN----VE  
 49KNcr 123 RADPHVGLLHRGTEKLE YKT-YLQALPYFDRLDYVSM MTNEQVFS LAVEKLLN----VE  
 49KXla 104 RCDPHIGLLHRGTEKLE YKT-YLQALPYFNRLDYVSM MCNEQAYSLAVEKLLN----IQ  
 49KBta 108 KCDPHIGLLHRGTEKLE YKT-YLQALPYFDRLDYVSM MCNEQAYSLAVEKLLN----IQ  
 49KHsa 108 KCDPHIGLLHRGTEKLE YKT-YLQALPYFDRLDYVSM MCNEQAYSLAVEKLLN----IR  
 HyfGEco 210 DADYRIF YVHRGMEKLAETRMGYNEVTFLSDRVCGICGFAH SVAYTNSVENALG----IE  
 HycEEco 208 DADYRIF YVHRGMEKLAETRMGYNEVTFLSDRVCGICGFAH STAYTTSVENAMG----IQ  
 FpoDMma 38 DAEVEMGYTHKGIEKLEENRT-YLQGITIVDRICYLVAITNEECYVGCVEKLLD----IE

NuoCDEco 295 VPDRVNVIRVLMSEIFRINSHLLYIISTFIQDVGAMTPVFEAETDRQKLYDIVEALTGERM  
 NuoCDRsp 280 VPPRAQMI RVM LCEFYRINNHLLFYGLMAQDVGAMSPVFMFTDREK GHEILNALTGARM  
 NuoDRca 110 VPRRASI RRVLFSEIGRIINHLLNVTIQAMDVGALT PPLWGFEBEREKLMIFYERACGARL  
 Nqo4Pde 110 IPRRASI RRVLYSEIGRIINHLLMGVITIGAMDVGALT PPLWGFEBAREELMIFYERACGARL  
 Nqo4Tth 109 VPPRAET RRVILNELSRLASHLVFLGTGLLDL GALTPPFYAFRERETI LLDLFEWVTGQRF  
 NuoDMtu 124 IPERVNVIRVLMMEELNRISSHLVALATGGMELGAMTPM FVGRAREIVLTLFEKITGLRM  
 49kYli 166 VPIRCKYIRITMFAETTRVLNHLMSVCSHAMDVGALT PFLWGFEBEREKLMIFYERVSGARL  
 49KNcr 178 IPERAKWIRITMFAETTRVLNHLMSVLSHAMDVGALT PFLWGFEBEREKLMIFYERVSGARL  
 49KXla 159 PPRAQWIRVLFGEITRLLNHLM AVTTHALD IGAMTPPFWMFEBEREKLMIFYERVSGARM  
 49KBta 163 PPRAQWIRVLFGEITRLLNHLM AVTTHALD IGAMTPPFWMFEBEREKLMIFYERVSGARM  
 49KHsa 163 PPRAQWIRVLFGEITRLLNHLM AVTTHALD IGAMTPPFWLFEBEREKLMIFYERVSGARM  
 HyfGEco 266 VPQRAHTIR SILL E VERLHSHLLNLGLSCHFVGFDTGFMQFERVREKSMVAEILLIGSRK  
 HycEEco 264 VPERAQMIRAILLEVERLHSHLLNLGLACHFTGFDSGFMQFERVRETSMKVAEILLTGARK  
 FpoDMma 93 PPERAQYIRVILEELSRILQSHELLGLGEYCEFTG FVSMFMYTIKEREDLITLIDMVTGARV

↓

|          |     |                                                                |
|----------|-----|----------------------------------------------------------------|
| NuoCDEco | 355 | HPAIFRIGGVAHDLPRGWDRLEFIDWMPKRLASYEKAALQNTLLKGRSQGVAAAYGAKF    |
| NuoCDRsp | 340 | HPAIFRIGGVAMDLPNGWDMVRGFLDWMFARLDEYERWVLRSEIFRARTVGVGAYDTDM    |
| NuoDRca  | 170 | HANYFRPGGVHQDLPPDLIDDIEIWAKAFFQVLDDEGLLTENRIFKQRNADICLIITEAF   |
| Nqo4Pde  | 170 | HAYFRPGGVHQDLPPDLLDDIEEWCFERFPKLVDDLLTLLTENRIFKQRVLDIGIVTEAD   |
| Nqo4Tth  | 169 | HHNYTRIGGVKEDLPEEFVPEIKKLEVLPHRIDEYEAIFAESPIFYERARGVGVIPPEV    |
| NuoDMtu  | 184 | NSAYTRPGGVAODLPPNAATEIAEAALKQLRQPIREMGEELLENNAIWKARTQGVYLDLTG  |
| 49kYli   | 226 | HAAVVRPGGVSODLPAGLLDDIYMWATQFGDRIDEIEELLTDNRIWKLRTVNIQIVTAQD   |
| 49KNcr   | 238 | HAAVVRPGGVHQDIPILGLLDDIYMWATQFGDRIDEIEEMLTNRIWIDRLRGIGVVSAA    |
| 49KXla   | 219 | HAAVVRPGGVHQDIPILGLMDDIYEFKKNFSIRVDEVEEMLTNRIWKNRTVDIGIVVSAE   |
| 49KBta   | 223 | HAAVVRPGGVHQDIPILGLMDDIYEFKKNFSIRVDEIEEMLTNRIWRNRITVDIGIVTAED  |
| 49KHsa   | 223 | HAAVTRPGGVHQDIPILGLMDDIYQEFKKNFSIRVDEIEELLTNNRIWRNRITVDIGVVTAE |
| HyfGEco  | 326 | TYCLNLIQGVVRDILKEQRLQTLKLVREMRADVSEIIVEMLLATPNMEQRTQIGIGLDRQI  |
| HycEEco  | 324 | TYCLNLIQGVRRDILKDDMIQTRQLAQQMRREVOELVDVLLSTPNMEQRTVIGIGRDPPEI  |
| FpoDMma  | 153 | THSYLRFGGVRDLDPECFKEKTIPIVINKLKKVIRDYEEMFYSDTIYRERTIGIGVLTAD   |

|          |     |                                                               |
|----------|-----|---------------------------------------------------------------|
| NuoCDEco | 415 | ALEWGITGAGLRATGIDFDVRKARPYSGYBNFDFEIPVGGVSDCYTRVMLKVBEELRQSL  |
| NuoCDRsp | 400 | ALLWGITGPGLRATGCDWDLRRLRPSGYEQEFFFVPLGQ-RGDIIDRTRVRADEMRESL   |
| NuoDRca  | 230 | IEKWGYSVVMVRGSGLAWDLRRAQPYECYDEFDFKVAVVGK-NGDCYDRYLVRMAEMREST |
| Nqo4Pde  | 230 | ALDWGYTGVMVRGSGLAWDLRRSQPYECYDEFDFQIPVGR-NGDCYDRYLVRMAEMRESC  |
| Nqo4Tth  | 229 | AIDLGLTGGSLRASGVNVDVRKAYPYSGYETTYTFDVPVIGE-RGDVDFRMLVRIEMRESV |
| NuoDMtu  | 244 | CMALGITGPIILRSIGLPHDLRKSEPYCGYQHYEFDVITDD-SCDAYGRYMRVVKEMWESM |
| 49kYli   | 286 | ALNLGLSGPMLRSGIPFDIRKNAPYDAYDKVDFDVPVGM-NGDCYDRYLVRMAEFROSL   |
| 49KNcr   | 298 | ALNLSFTGVMLRSGIPWDLRKSQPYDAYDQVEFDVPVGI-NGDCYDRYLVRMAEFROSL   |
| 49KXla   | 279 | ALNYGFSGVMLRSGIQWDLRKSQPYDVIDQVEFDVPVIGS-RGDCYDRYLVRMAEFROSL  |
| 49KBta   | 283 | ALNYGFSGVMLRSGIQWDLRKTQPYDVIDQVEFDVPVIGS-RGDCYDRYLVRMAEFROSL  |
| 49KHsa   | 283 | ALNYGFSGVMLRSGIQWDLRKTQPYDVIDQVEFDVPVIGS-RGDCYDRYLVRMAEFROSL  |
| HyfGEco  | 386 | ARDL-----RFDHPYADYGNLPKTLFTFT-GGDVFSRVVVRVKEFTFDSL            |
| HycEEco  | 384 | ARDFSNVGPVVRASCHARDTRADHPFVGYGLLPMFVHSEQ-GCDVISRLKVRINEVYDAL  |
| FpoDMma  | 213 | AKSLGVSQVLRATGVPFDIRKNEPYLVYRDLDKFKVCTET-AGDCHARVQVRLNEMRESL  |

|          |     |                                                                |
|----------|-----|----------------------------------------------------------------|
| NuoCDEco | 475 | RILEQCLNNMPEGP-----FKADHPLTTP-----PPKE---RTLQHLETLIHHFLQV      |
| NuoCDRsp | 459 | KIIRQCLNNMPEGP-----VKADHPLTTP-----PPRG---AMQKDIETLIHHFLQS      |
| NuoDRca  | 289 | KIILQACAKLRAPDG-----QGDILARGKLTTP-----PKRA---EMKTSMEALIHHPKLY  |
| Nqo4Pde  | 289 | KIMQQAQKLRAPD-----AGDVLARGKLTTP-----PRRA---EMKRDMEALIHHPKLY    |
| Nqo4Tth  | 288 | KIIRKQALERLEPGP--VRD-----PNPQITTP-----PPRH---LLETSMBAVIYHHPKHY |
| NuoDMtu  | 303 | KIVEQCLDKLRPGPTMISDRKLAWPADLQVGPDGLGNSPKHIAKIMGSSMEALIHHPKLV   |
| 49kYli   | 345 | RIIEQCCNDMPAGA-----VKVEDFKINS-----PPRN---LMKEDMEALIHHPFLY      |
| 49KNcr   | 357 | RIIRHQCLNKMPAGE-----VRVEDYKISP-----PPRS---AMKENMEALIHHPFLY     |
| 49KXla   | 338 | RIILQCLNKMPAGE-----IKVDDAKVSP-----PKRS---EMKHSMEALIHHPKLY      |
| 49KBta   | 342 | RIISQCLNKMPAGE-----IKVDDAKVSP-----PKRA---EMKTSMEALIHHPKLY      |
| 49KHsa   | 342 | RIIAQCLNKMPAGE-----IKVDDAKVSP-----PKRA---EMKTSMEALIHHPKLY      |
| HyfGEco  | 429 | AMIEFALDNMPDTP-----LIT-----LIT                                 |
| HycEEco  | 443 | NMIDYGLDNMPGGP-----LNV-----LNV                                 |
| FpoDMma  | 272 | YIIEQCLDMIPNGP-----IFP-----EG-----TPYGKR                       |

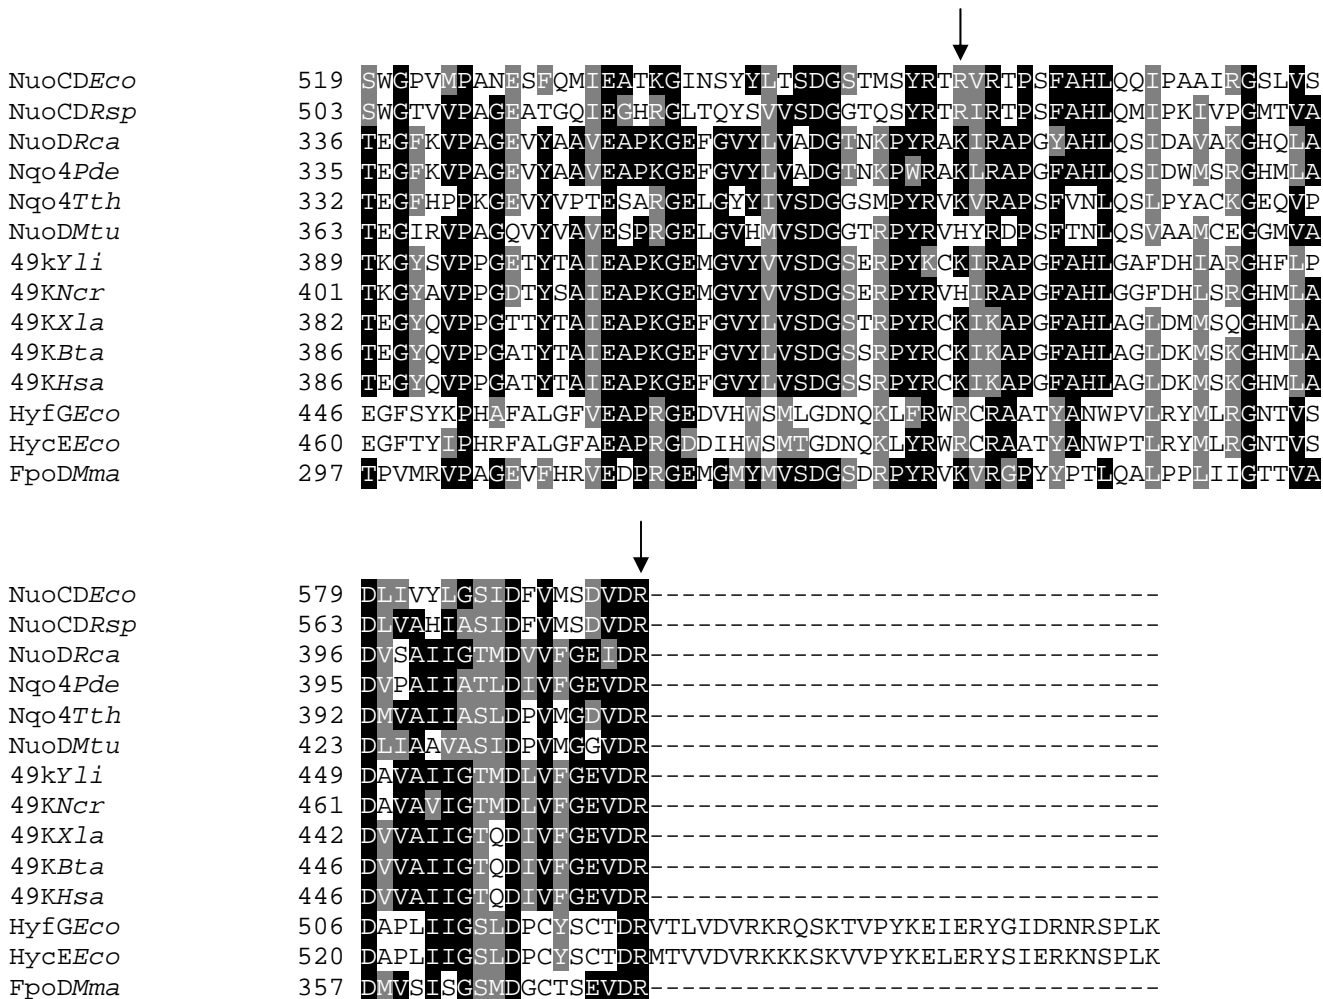

**Supplemental Figure 1:** Sequence alignment of the NuoD segment of *E. coli* NDH-1 with its homologues from other organisms. The alignment was done using ClustalW (61). The shading of the residues from the D segment was done by the default Box-shade program based on their similarity. Amino acids mutated in this study are marked by arrows. Sequence sources and their Swiss-Prot accession numbers are: NuoCDEco, *E. coli* K-12 NuoCD subunit [P33599]; NuoCDRsp, *R. spheroides* NuoCD subunit [B9KJ11]; NuoDRca, *R. capsulatus* NuoD subunit [O07310]; Nqo4Pde, *P. denitrificans* Nqo4 subunit [A1B495]; Nqo4Tth, *T. thermophilus* HB-8 Nqo4 [Q56220]; NuoDMtu, *Mycobacterium tuberculosis* NuoD subunit [A5U7G4]; 49KYli, *Yarrowia lipolytica* NUCM subunit [Q9UUU1]; 49KNcr, *Neurospora crassa* 49K subunit [P22142]; 49KXla, *X. laevis* 49K subunit [Q32NR8]; 49KBta, *Bos taurus* 49K subunit [P17694]; 49KHsa, *Homo sapiens* 49K subunit [O75306]; HyfGEco, *E. coli* HyfG subunit [P77329]; HycEEco, *E. coli* HycE subunit [P16431]; FpoDMma, *Methanosarcina mazei* F420H2 dehydrogenase FpoD subunit [Q9P9G0].

## Supplemental Figure 2

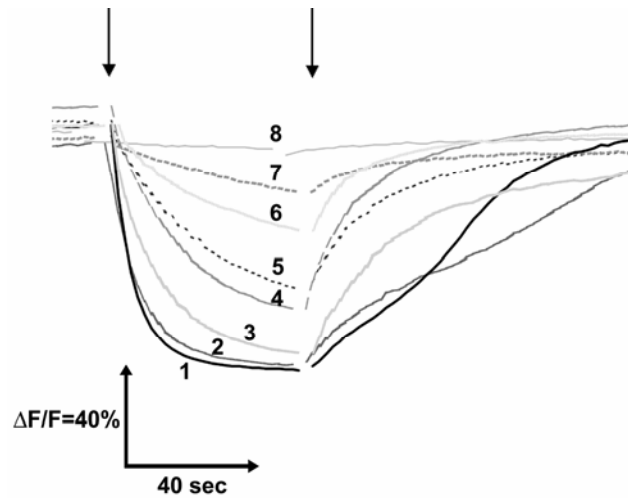

**Supplemental Figure 2. Generation of a pH gradient coupled to dNADH oxidation in *E. coli* NuoD mutants.** Proton translocation was measured by the quenching of the fluorescence of ACMA at room temperature with an excitation wavelength of 410 nm and an emission wavelength of 480 nm. At the time indicated by arrows, 0.2 mM dNADH or 10  $\mu$ M FCCP respectively, was added to the assay mixture containing 50 mM MOPS (pH7.3), 10 mM  $MgCl_2$ , 50 mM KCl, 2  $\mu$ M ACMA, and *E. coli* membrane samples (50  $\mu$ g of protein/ml). Representative traces from different group of mutants: 1, WT, KO-rev, H224R, G251A, R298K; 2, R228A, G235A, H315A, R228K, R298A, E308D; 3, D325A, G225A, R311K; 4, R556A, D325E, R270K; 5, H315R, Y273A, E236D ; 6, R270A, R311A; 7, E288Q, E288D, H355A ; 8, NuoD-KO, E308Q and G225V.

### Supplemental Figure 3

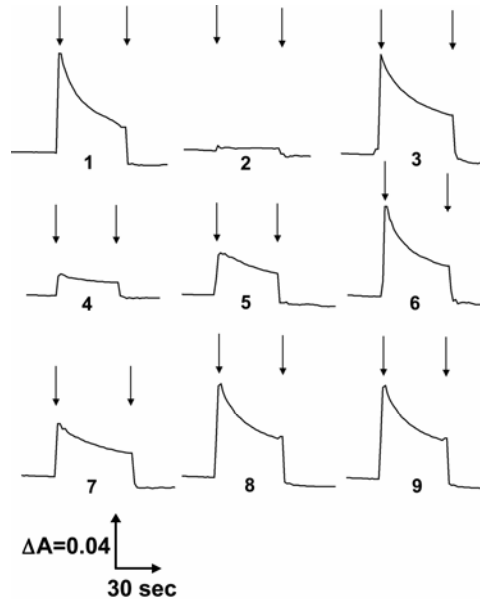

**Supplemental Figure 3. Detection of the membrane potential generated by dNADH oxidation in *E. coli* NuoD mutants.** The membrane potential assay mixture contained 50 mM MOPS (pH 7.3), 10 mM MgCl<sub>2</sub>, 50 mM KCl, 2 μM oxonol VI, and *E. coli* membrane samples (330 μg of protein/ml). The absorbance changes of oxonol VI were observed at 630-603 nm at 37 °C. The first arrow shows addition of 0.2 mM dNADH and the second arrow indicates addition of 2 μM FCCP to the assay mixture. Representative traces from different group of mutants: 1, WT, G251A and R298K; 2, NuoD-KO, G225V, E288Q, E288D, E308Q and H355A; 3, KO-rev; 4, E288D, H315R; 5, G225A, R311K, D325E; 6, R298A, R228K; 7, D325A, ; 8, H315A, E308D; 9, R270K.
